# Supplementary material for: Targeted memory reactivation in human REM sleep elicits detectable reactivation
Source: eLife. 2023 Jun 23;12:e84324. doi: 10.7554/eLife.84324 (PMC10425171; doi:10.7554/eLife.84324)
Supplement: Supplementary file 1. [file elife-84324-supp1.xlsx]

## Sheet: Sheet1
Participant	Left hand	Right hand
1	466	490
2	574	574
3	547	532
4	332	315
5	706	712
6	463	457
7	637	634
8	252	250
9	611	593
10	449	441
11	591	579
12	367	355
13	433	428
14	390	388
